1     **Frame-by-frame annotation of video recordings using**  
2                                   **deep neural networks**

3     **Alexander M. Conway<sup>1</sup>, Ian N. Durbach<sup>\*1,2</sup>, Alistair McInnes<sup>3,4</sup>, and Robert N.**  
4                                   **Harris<sup>5</sup>**

5     <sup>1</sup>Centre for Statistics in Ecology, the Environment, and Conservation, University of Cape Town, South Africa

6         <sup>2</sup>Centre for Research into Ecological and Environmental Modelling, University of St Andrews, UK

7             <sup>3</sup>Seabird Conservation Programme, BirdLife South Africa

8     <sup>4</sup>DST/NRF Centre of Excellence at the Percy FitzPatrick Institute, Department of Zoology, Nelson Mandela  
9                                   University, South Africa

10             <sup>5</sup>Sea Mammal Research Unit, University of St Andrews, UK

---

\*Corresponding author: [ian.durbach@uct.ac.za](mailto:ian.durbach@uct.ac.za)

## Abstract

Video data are widely collected in ecological studies but manual annotation is a challenging and time-consuming task, and has become a bottleneck for scientific research. Classification models based on convolutional neural networks (CNNs) have proved successful in annotating images, but few applications have extended these to video classification. We demonstrate an approach that combines a standard CNN summarizing each video frame with a recurrent neural network (RNN) that models the temporal component of video. The approach is illustrated using two datasets: one collected by static video cameras detecting seal activity inside coastal salmon nets, and another collected by animal-borne cameras deployed on African penguins, used to classify behaviour. The combined RNN-CNN led to a relative improvement in test set classification accuracy over an image-only model of 25% for penguins (80% to 85%), and substantially improved classification precision or recall for four of six behaviour classes (12–17%). Image-only and video models classified seal activity with equally high accuracy (90%). Temporal patterns related to movement provide valuable information about animal behaviour, and classifiers benefit from including these explicitly. We recommend the inclusion of temporal information whenever manual inspection suggests that movement is predictive of class membership.

**Keywords:** image classification, video classification, deep learning, neural networks, animal-borne video, automated detection

## 1 Introduction

Technological advances in quality, size, battery life and storage capacity have enabled video cameras to record more data at better quality on a broader variety of animals, becoming small enough to deploy on numerous animal species (Rutz & Troscianko, 2013; Takahashi et al., 2004) and on drones (Anderson & Gaston, 2013; Cruzan et al., 2016), as well as in more conventional fixed locations. Footage captured using video cameras needs to be annotated for use in scientific research, a currently labour intensive process often involving highly trained scientists manually annotating the content of videos frame by frame. Even with dedicated annotation software, this presents a major bottleneck for scientific research based on these data, necessitating the development of computer-assisted approaches (Schneider, Taylor, Linqvist, & Kremer, 2019; Weinstein, 2015).

41 Video classification is a challenging modelling problem, with the challenges of image classifica-  
42 tion amplified because the same sources of natural visual variation occur not only between videos  
43 but also within videos as objects move around and change poses, scales, illuminations and back-  
44 grounds during the course of a single video. The video camera itself can move around during  
45 recording, introducing additional variation, particularly in environments where cameras move due  
46 to wind or water movement, or because cameras are attached to animals moving around their en-  
47 vironment. The temporal component of video also presents significant modeling challenges not  
48 only because it dramatically increases the size of video data but because the relevant visual fea-  
49 tures required to classify a video can span several frames with no single frame containing enough  
50 information on its own. The pixels of an image representing objects are not only correlated spa-  
51 tially to form visual object features in a single frame but are also correlated through time.  
52 Like image classification, traditional computer-based approaches to video classification have pri-  
53 marily used feature engineering algorithms that create input variables based on predetermined  
54 traits. Spatial algorithms construct variables such as Harris or SIFT features (Lowe, 2004) that  
55 discriminate patterns within an image (e.g. morphometric features), while spatio-temporal algo-  
56 rithms such as the Cuboid and Harris-3D detectors (Dollár, Rabaud, Cottrell, & Belongie, 2005)  
57 capture additional motion information between frames. The main limitations of these approaches  
58 arise from their need to know how to represent input features in advance – this requires substan-  
59 tial knowledge of the study species, and hinders generalization across species and environmental  
60 contexts (Schneider et al., 2019).

61 Deep neural networks (DNNs) are highly flexible machine learning models that use stacked non-  
62 linear combinations of inputs together with a gradient descent learning procedure to jointly learn  
63 feature representations together with how these should be translated into classifications, based

64 on labeled data, thus avoiding the main drawback of feature engineering. DNNs are the current  
65 state-of-the-art for many challenging perceptual problems involving image, video, audio or text,  
66 where hand-designing input feature representations is nontrivial (Liu, Wang, Liu, Liu, & Alsaadi,  
67 2016).

68 Convolutional neural networks (CNNs) are a specialized kind of DNN architecture that takes  
69 advantage of the characteristics of image data to learn hierarchies of local features that are in-  
70 variant to common translation operations like shifting, stretching and rotation. This reduces the  
71 number of required parameters while leaving enough representational power to achieve good  
72 performance on image classification and other tasks involving data that have a regular grid-like  
73 topology of locally correlated hierarchical features. CNNs typically involve a stacked sequence  
74 of convolutional layers – traversing the network, the output of each of these layers can be thought  
75 of as an increasingly complex summary or ‘encoding’ of the input image as a one-dimensional  
76 numeric vector. CNNs have found numerous, and increasing, applications in ecological studies  
77 (Christin, Hervet, & Lecomte, 2019; Weinstein, 2018a), where image classification has been used  
78 for species identification (Gomez Villa, Salazar, & Vargas, 2017; Weinstein, 2018b; Zhang, He,  
79 Cao, & Cao, 2016), count surveys (Borowicz et al., 2018; Gray, Fleishman, et al., 2019; Torney  
80 et al., 2019), individual animal re-identification (Schneider et al., 2019), and morphometric mea-  
81 surement (Gray, Bierlich, et al., 2019). Applications to video classification, however, remain rare.  
82 With the exception of Trinh, Yoshihashi, Kawakami, Iida, and Naemura (2016), who combined  
83 neural network architectures to detect birds flying into wind turbines from sequences of input  
84 frames, most studies have either classified frames in isolation (Siddiqui et al., 2018), or used  
85 previous frames primarily to improve the discrimination of the focal animal from background  
86 scenery, using motion-detection algorithms (Weinstein, 2018b; Zhang et al., 2016).

87 There are three approaches to using DNNs for video classification beyond treating the problem as  
88 an image classification task by modeling frames independently. The simplest approach concate-  
89 nates the vector encodings obtained from each of a sequence of input images to predict the class  
90 of the last image in the sequence; images in the input sequence are considered to be independent.  
91 The second approach uses the sequence of vector encodings produced from the sequence of input  
92 images as input to a second model – a recurrent neural network (RNN), a specialized architec-  
93 ture often used to process sequential data involving a temporal component (Donahue et al., 2014;  
94 Trinh et al., 2016). Finally, CNNs can be directly modified to incorporate motion information in  
95 videos by extending their convolution from two spatial dimensions (width and height) to three  
96 spatio-temporal dimensions (width, height and time), parameters of which are jointly estimated  
97 (Tran, Bourdev, Fergus, Torresani, & Paluri, 2015).

98 In this paper we have used these approaches to perform frame-by-frame annotation of two video  
99 datasets. The first was taken from a fixed underwater camera placed inside nets at a salmon trap  
100 net fishery in Scotland, for the purpose of detecting seal visits to salmon nets and ultimately re-  
101 ducing conflict between fisheries and seals. Here the task was to detect whether a seal is present  
102 in a frame, based on that and preceding frames. The second dataset was collected by animal-  
103 borne cameras deployed on African penguins in South Africa. Here the purpose was to repli-  
104 cate manual annotations allocating each frame to one of six pre-defined classes covering diving  
105 and surface behaviour exhibited by the birds. To the best of our knowledge, this is the first time  
106 DNNs have been applied to annotate animal-borne video. For each dataset, our primary goal was  
107 to evaluate whether incorporating the temporal component of video brings any improvement in  
108 classification accuracy, relative to an image-only benchmark.

## 109 **2 Materials and Methods**

### 110 **2.1 Data**

#### 111 **2.1.1 Seals**

112 An underwater video system was used to study seal behaviour at a salmon trap net fishery in  
113 north east Scotland in 2015 as part of a programme of research aimed at reducing conflict be-  
114 tween fisheries and seals. Cameras were placed inside static coastal nets to monitor seals as they  
115 moved in and out of nets to depredate salmon. There was no artificial lighting and so the cameras  
116 recorded during hours of daylight.

117 The labelled component of the dataset consisted of six video recordings of ca 140 minutes each,  
118 converted into images at 4fps. A total of 152 instances in which a seal entered the net were ob-  
119 served by manual inspection, and entry and exit times for each of these recorded (Figure A.1,  
120 Appendix A). Visits lasted between 2s and 59s, with an average duration of 13.5s. Seals were not  
121 visible in frame for the entire duration of a visit, so all images between the start and end times of  
122 a recorded visit were manually inspected and labelled as containing a seal or not. After process-  
123 ing, there were 4419 images containing a seal. While the vast majority of footage does not con-  
124 tain a seal in frame, we restricted the number of absence images to 7809, roughly twice the num-  
125 ber of seal images, to avoid a large class imbalance. Absence images were collected by randomly  
126 sampling segments of video from the remainder of the video. Images from four videos were used  
127 to train models (3826 seal, 6949 no seal), while images from each of the remaining two videos  
128 were used as validation (407 seal, 973 no seal) and test (192 seal, 111 no seal) datasets respec-  
129 tively.

## 130 **2.1.2 Penguins**

131 Animal-borne video recorders (AVR) were deployed on breeding African penguins attending  
132 small chicks at Stony Point, South Africa, between 2015 and 2016 (McInnes, McGeorge, Gins-  
133 berg, Pichegru, & Pistorius, 2017). The AVRs were tube-shaped, and together with the casing  
134 weighed 100g with dimensions  $104 \times 26 \times 28$ mm. Devices were attached to the lower backs of the  
135 penguins with strips of waterproof tape during the evening preceding an anticipated foraging trip.  
136 AVRs were programmed to divide the battery life into two recording bins of ca 30 min each, at  
137 sunset and midday to reflect potential temporal differences in diving behaviour. Recorders were  
138 retrieved when the bird returned to the colony, either on the same day that the bird was at sea and  
139 after the bird had time to provision its chicks, between 16:00 and 20:00, or the following morning  
140 if the bird could not be located the previous day.

141 The labelled component of the dataset consisted of 12 video recordings of ca 30 minutes each,  
142 again converted into images at 4fps. These were manually classified into five diving behaviours  
143 (subsurface diving (less than 1m); shallow diving (1-5 m); and the descent, bottom, and ascent  
144 phases of deep dives) and one surface behaviour (searching, see Figure A.2, Appendix A). A total  
145 of 52722 images were obtained, with substantial imbalance between behaviours (Table A.1, Ap-  
146 pendix A). Images from nine videos were used to train models (41958 images, see Table A.1 for  
147 distribution over behaviours), while images from the remaining videos were used as validation  
148 (two videos, 7168 images) and test (one video, 3596 images) datasets respectively.

## 149 **2.2 Neural networks**

150 We consider four broad classes of models, of increasing complexity. The first ignores the tem-  
151 poral aspect of video data and attempts to classify each image independently using a standard

152 CNN-based approach. Pretrained CNNs (VGG16, ResNet50, Inception v3 and Inception-ResNet  
153 v2) were truncated at an intermediate layer – the output of this intermediate layer summarizes  
154 or ‘encodes’ an image in a one-dimensional vector. Up to three dense layers were added to the  
155 truncated network, and a new output layer added for the (seal or penguin) classification task. The  
156 second model used the same approach, but classified an image by first concatenating the vector  
157 encoding obtained from the truncated layer for that image with similar vectors obtained for the  
158 previous  $F - 1$  images. This concatenated vector, which summarizes a set of  $F$  consecutive im-  
159 ages rather than (as in the first model) just a single image, was then passed these to subsequent  
160 dense layers as before. The third model was the spatial-then-temporal model described in the  
161 introduction. To classify a single image, it took the vector encodings from the last  $F$  images (in-  
162 cluding the current image), as in the previous model, but instead of concatenating the encodings it  
163 passed these as input to a recurrent neural network, which combined these temporally (Figure 1).  
164 We used two pre-trained CNNs to encode frames (ResnNet50, VGG16) and three different RNN  
165 architectures (Long Short-Term Memory (LSTM), SimpleRNN, Gated Recurrent Units (GRU)).  
166 One key step was to pre-compute the frame vector encodings from the pre-trained CNN mod-  
167 els so that these did not have to be re-computed in each RNN model. A single training epoch for  
168 the mixed recurrent convolutional network (RCNN) architecture with a VGG encoder took ap-  
169 proximately 15 minutes without pre-computation but only 3 seconds with pre-computed features  
170 (because most of the computation time was spent in the CNN part of RCNN). The final model  
171 jointly modelled spatial and temporal aspects using a 3-dimensional CNN that convolves simul-  
172 taneously over space and time. Because convolutions occur simultaneously over space and time,  
173 the 3-D CNN cannot leverage pre-computation, and generators had to be used to stream the data  
174 from disk to avoid out-of-memory problems. Despite various attempts at optimization, a single



175 model took approximately 3 days to converge on a single GPU, and returned substantially worse  
176 accuracy than even an image-only model. We therefore do not report on these results further.  
177 We chose model hyperparameters using a grid search over the number of nodes in each of the  
178 three dense layers in Model 1 and 2 (32, 64, 96, ..., 512), the dropout rate (0, 0.1, 0.2, ..., 0.5),  
179 and the length of the sequence of images used in Models 2 and 3 (1, 3, 5, 7, 9, ..., 31). Follow-  
180 ing Krizhevsky, Sutskever, and Hinton (2012), each model's weights were initialized using the  
181 Xavier initialization and each model was trained in 3 rounds of 20 epochs with an early stopping  
182 patience of 5 epochs using the Adam optimizer (Kingma & Ba, 2014). The learning rate was ini-  
183 tially set to 0.001 and reduced by a factor of 10 between training rounds, and max pooling was  
184 used. Models were evaluated based on test set accuracy (proportion of all predictions that were  
185 correct), precision (proportion of positive predictions that were correct), and recall (proportion  
186 of positive examples correctly predicted). For the seals dataset, seal presence is a natural choice  
187 for the positive class. For multi-class classification problems, precision and recall were obtained  
188 for each class, and overall precision and recall calculated as an average of these, weighted by  
189 sample size. Models were implemented using the TensorFlow (Abadi et al., 2016) library with  
190 Keras (Chollet et al., 2015). Training and testing were done on a three separate Linux virtual ma-  
191 chine instances running on Google Cloud Platform, each with eight Nvidia Tesla K80 Graph-  
192 ics Processing Units (GPUs), 160 GB of RAM and 32 CPU cores. Code and analysis scripts  
193 are available online at [https://github.com/alxcnwy/Deep-Neural-Networks-for-Video](https://github.com/alxcnwy/Deep-Neural-Networks-for-Video-Classification)  
194 `-Classification`.

## 195 **3 Results**

196 A video component did not bring meaningful benefits in detecting seals, with both image-only  
197 and video models accurately classifying 89% of images in the test set, and small improvements  
198 in precision being offset by marginally worse recall (Table 1). Most incorrect classifications oc-  
199 curred at the beginning and end of visits, as the seal was entering or exiting the field of view and  
200 where only a small part of the seal may be in view (Figure B.1, Appendix B). All 152 seal visits  
201 across training, validation, and test sets were detected by either model.

202 Including temporal information in video data, in the form of spatial-then-temporal models, im-  
203 proved the accuracy of penguin behaviour classifications from 80.5% (image-only benchmark)  
204 to 85.4%, a 25% relative reduction in classification error (Table 1), and improved both precision  
205 and recall. Models concatenating frame encodings occupied an intermediate position between  
206 full video and image-only models. Classification accuracy improved for most penguin behaviour  
207 types (Table B.1, Appendix B), but particularly for descent and bottom dive phases (precision in-  
208 creasing by 17% and 14%), and for shallow and subsurface dives (recall increasing by 12% and  
209 13%). Image-only models tended to misclassify bottom dives as descent dives, and mistook parts  
210 of the ascending and descending dive phases for shallow dives. To some extent this reflects fuzzy  
211 boundaries between behavioural classes, but temporal information resolved some of these mis-  
212 classifications (Figure 2). Search activity, the sole surface behaviour and also the most prevalent  
213 class, was almost perfectly discriminated.

214 Preferred RCNN models for seal detection achieved a degree of parsimony by using a relatively  
215 short sequence of frames, and in exchange used relatively complex pre-trained CNN (ResNet50)  
216 and RNN (LSTM) architectures (Table B.2, Appendix B). In contrast, equivalent preferred mod-

217 els for penguin behaviour classification used longer sequences of frames, but simpler CNN (VGG16)  
218 and, sometimes, RNN (SimpleRNN) architectures (Table B.3, Appendix B). Both applications se-  
219 lected a relatively large number of nodes in the final hidden layers.

## 220 **4 Discussion**

221 Although images are more commonly used in ecological research and are easier to work with  
222 (Swinnen, Reijnen, Breno, & Leirs, 2014), movement information contained in video provides  
223 richer insight into animal behaviour and taking this into account can improve the identification  
224 of animals and their behaviours (Trinh et al., 2016). We found that for a relatively simple task –  
225 detecting seal activity in an image – an image-only CNN was adequate, and incorporating tempo-  
226 ral information did not meaningfully improve out-of-sample performance, even for those difficult  
227 cases in which a seal enters or exits the field of view. For a more difficult task of inferring pen-  
228 guin behaviour from animal-borne cameras, using a video model led to substantial reduction in  
229 classification error over an image-only model, and was particularly useful in disentangling cer-  
230 tain kinds of diving behaviour. In both applications accuracy is not sufficient for full automa-  
231 tion of the tasks, but can facilitate manual processes by partially labelling the data – identifying  
232 those classes that can be accurately discriminated and pointing the researcher to segments re-  
233 quiring closer inspection. Our datasets were relatively small, consisting of 6-12 hours of labelled  
234 footage, and the ability of the models to generalize to new environments is unclear, but even in  
235 those classes where absolute performance was moderate, video models outperformed image-only  
236 models. Improvements are likely to be larger with larger datasets.

237 Practically, researchers wanting to construct a model for the frame-by-frame annotation of video  
238 have to follow a number of steps: manually labelling a subset of the data; converting the video

239 into images; allocating these images between training, validation, and test sets; choosing appro-  
240 priate neural network architectures and estimating the parameters of those models; selecting a  
241 preferred model and using it to process the unlabelled portion of the data; and linking frame-by-  
242 frame predictions to the broader research objectives for which the classifier was developed.

243 Video data are manually annotated by recording the start and end times of events whose bound-  
244 aries may be difficult to distinguish precisely. Poorly separated classes can reduce classification  
245 accuracy, and preprocessing steps for image classification sometimes remove ambiguous images  
246 to improve class separability. Video models, however, use a sequence of frames  $t, t - 1, \dots, t - F$   
247 to predict the class of frame  $t$ , and removing ambiguous images makes the time difference be-  
248 tween adjacent images variable. While it is possible that removing ambiguous examples may  
249 improve accuracy more than maintaining constant time difference between images, this is likely  
250 to be case-specific, and not generally recommended. Rather, the presence of ambiguous images  
251 places an effective upper limit on the accuracy that can be achieved, which may or may not im-  
252 pact on broader research objectives. For seal visits, for example, the detection of a seal presence  
253 is more important than identifying the exact time of entry. The first and last few frames of a visit  
254 often contain only a tiny sliver of seal or, because the times are approximate, no seal at all. These  
255 frames reduce classification accuracy but have very little bearing on the practical usefulness of  
256 the classifier.

257 Video data are converted to images at a user-specified frame rate, with the recording equipment  
258 setting an upper bound. A higher frame rate increases the number of images available to train  
259 models, which is always beneficial as long as there are meaningful differences between adjacent  
260 images. It is important to randomly allocate contiguous sequences of frames i.e. video sequences,  
261 to training, validation and test datasets, rather than randomly allocating the frames themselves.

262 Doing the latter breaks apart sequences, losing potentially valuable information, and also means  
263 that very similar images occur in both training and test sets. We also recommend assessing whether  
264 the video in the test dataset has the same environmental conditions as video used to train the  
265 model (e.g. if a random segment of each file is used to test). If so, the ability of the model to gen-  
266 eralize to new environments may be overestimated.

267 When building an RCNN, key choices are what frame rate and sequence length to use. These  
268 factors are study-specific, and the chosen frame rate need not be the same as the frame rate used  
269 to convert video to frames. Higher frame rates allow for fine-scale changes in movement to be  
270 captured, but the same number of frames covers a shorter time interval. Increasing sequence  
271 length requires more parameters, increasing the chances of overfitting and requiring more data.

272 Which of the two – looking back further in time or capturing fine-scale movement – benefits  
273 classification accuracy more will be study-specific. These factors can be investigated by search-  
274 ing over possible frame rate/length pairs, but this quickly becomes computationally expensive.

275 Our applications have relatively little labelled data and so we fixed the frame rate to one that  
276 would allow broad differences in behaviour, observed over a few seconds, with  $5 < F < 10$ . Pre-  
277 trained CNNs offer a parsimonious way of summarizing images in a form that can be passed on  
278 the second-stage RNN (Donahue et al., 2014). Our best seal model combined a relatively com-  
279 plex CNN and RNN with a short frame sequence, whereas the best penguin model had a sim-  
280 ple CNN and RNN, but used a longer sequence of frames. Since model complexity is primarily  
281 achieved through more parameters, this balance reflects the familiar goal of reducing validation  
282 error through model parsimony.

283 Our models allow new video footage to be classified on a frame-by-frame basis, with some ex-  
284 pected degree of accuracy. Linking this back into research objectives is the final step in the pro-

285 cess. The seal classifier is intended to be used as a detection system. Even with a frame-specific  
286 false negative rate of 10%, no visits were missed entirely. An alarm system, triggered by  $N$  pre-  
287 dicted presences in a sequence of  $M$  frames, is easily established, with  $N$  and  $M$  determined by  
288 balancing costs of false positives and negatives. Graphical displays such as Figure 2 convey this  
289 information in an easily digested way. Higher error rates prevent the use of the penguin behaviour  
290 classifier for the purpose it was intended for – replicating a human observer and calculating en-  
291 ergy budgets – because certain classes of behaviour are poorly identified. However, surface be-  
292 haviour was nearly perfectly distinguished from diving behaviour, and deep and shallow/subsur-  
293 face dives were also well differentiated. These distinctions hold practical value, and also limit the  
294 amount of manual labelling that must be done.

295 Deep learning holds enormous promise for automating the labelling of video data, a process that  
296 looks increasingly unsustainable with manual methods. Case studies such as the ones reported  
297 here play an important role in reporting successes and failures, and developing and disseminat-  
298 ing best practices. Classification of ecological data is difficult. Limited time and other resources,  
299 remote locations, and rare or difficult-to-detect target species, serve to decrease sample sizes at  
300 the same time that variable background environments increase the necessary sample sizes for  
301 good classification. In these contexts full automation is perhaps, for the time being, unrealistic.  
302 Facilitating the process of manually annotating video datasets is both valuable and achievable.  
303 Video data has the great advantage that large datasets, in terms of numbers of images, are often  
304 collected relatively quickly. At 60fps, a one minute encounter with an animal provides 3600 im-  
305 ages. This offers exciting opportunities for developing and testing deep learning approaches. Our  
306 study suggest that many applications may benefit from incorporating temporal information in  
307 video, where the goal remains to predict the class to which a particular frame or image belongs.

308 We expect these models to be widely used and developed in the near future.

### 309 **Acknowledgements**

310 The penguin data collection was financially supported by Homebrew Films and the Percy Fitz-  
311 patrick Institute of African Ornithology. All fieldwork was done under permission from the South  
312 African Department of Environmental Affairs (permit nos RES 2015/38 and RES 2016/100) and  
313 Cape Nature (permit no. AAA007-00209-0056). We thank Cape Nature and the South African  
314 Department of Environmental Affairs for providing permission to carry out the study. The seal  
315 data collection was funded by the Scottish Government through the Marine Mammal Scientific  
316 Support Research Programme. ID is supported in part by funding from the National Research  
317 Foundation of South Africa (Grant ID 90782, 105782).

### 318 **Authors' contributions**

319 All authors conceived the work together. RH collected and annotated seal data, and provided  
320 feedback on model usability results. AM did the same for the penguin data. AC and ID developed  
321 the modelling approach. AC implemented the models and performed analyses. AC and ID wrote  
322 the paper. All authors contributed critically to the drafts and gave final approval for publication.

### 323 **Data accessibility**

324 Code and analysis scripts are available online at <https://github.com/alxcnwy/Deep-Neural>  
325 [-Networks-for-Video-Classification](#). A subset of seal and penguin video recordings,  
326 manual annotations, and results have been stored on Zenodo: [https://doi.org/10.5281/](https://doi.org/10.5281/zenodo.3842040)  
327 [zenodo.3842040](#).

| Seal detection model  |       |       |       |       |
|-----------------------|-------|-------|-------|-------|
| Architecture          | RCNN  | RCNN  | RCNN  | IMAGE |
| Accuracy (Test)       | 89.4% | 89.2% | 89.1% | 89.1% |
| Precision (Test)      | 100%  | 99.4% | 100%  | 97.6% |
| Recall (Test)         | 83.9% | 83.9% | 83.3% | 84.9% |
| Accuracy (Validation) | 96.3% | 95.9% | 95.7% | 93.7% |
| Accuracy (Train)      | 95.4% | 95.4% | 95.3% | 95.2% |

  

| Penguin behaviour classifier |       |       |       |       |
|------------------------------|-------|-------|-------|-------|
| Architecture                 | RCNN  | RCNN  | RCNN  | IMAGE |
| Accuracy (Test)              | 85.4% | 84.0% | 84.2% | 80.5% |
| Precision (Test)             | 85.4% | 84.0% | 84.2% | 80.5% |
| Recall (Test)                | 87.6% | 87.6% | 85.5% | 82.8% |
| Accuracy (Validation)        | 82.6% | 82.4% | 81.0% | 81.5% |
| Accuracy (Train)             | 90.0% | 88.9% | 94.4% | 88.7% |

Table 1: Classification accuracy for three best video models and best image model. Including temporal information in the form of an RCNN led to very marginal improvement in the easier seal detection task, but gave a 25% relative improvement in the ability to discriminate penguin behaviours, largely due to improved performance at the start and end of behaviours (Figure 2). Further details on the architectures and run times of these models are given in Table B.2 and B.3, Appendix B.



328 **Figure legends**

329 **Figure 1**

330 A “spatial-then-temporal” neural network for frame-by-frame video classification. To predict the  
331 class of a frame (Frame 5), a pre-trained, truncated CNN (e.g. ResNet50) is used to summarize  
332 or ‘encode’ each of a sequence of images (here, the last five frames) as one-dimensional numeric  
333 vectors. The sequence of vector encodings is then used as input in a recurrent neural network  
334 (RNN), here shown using two SimpleRNN layers. The RNN outputs predicted probabilities that  
335 the behaviour in the final frame is of type  $i$ ,  $i = 1, \dots, 6$ .

336 **Figure 2**

337 Predicted probabilities for penguin behaviour classes, with misclassifications plotted as crosses.  
338 Observed and predicted classes are plotted above the probabilities, using the same notation. Image-  
339 only models tend to misclassify bottom dives as descent dives (frame 350–390), and ascending  
340 and descending dive phases as shallow dives (frame 90–110 and 260–280). Video models resolve  
341 some of these errors. They also smooth transitions between behaviours (frame 260–280), better  
342 identify periods where classification uncertainty is high (frame 570-620, 750-850) and where al-  
343 ternate interpretations are possible (frame 570-620).

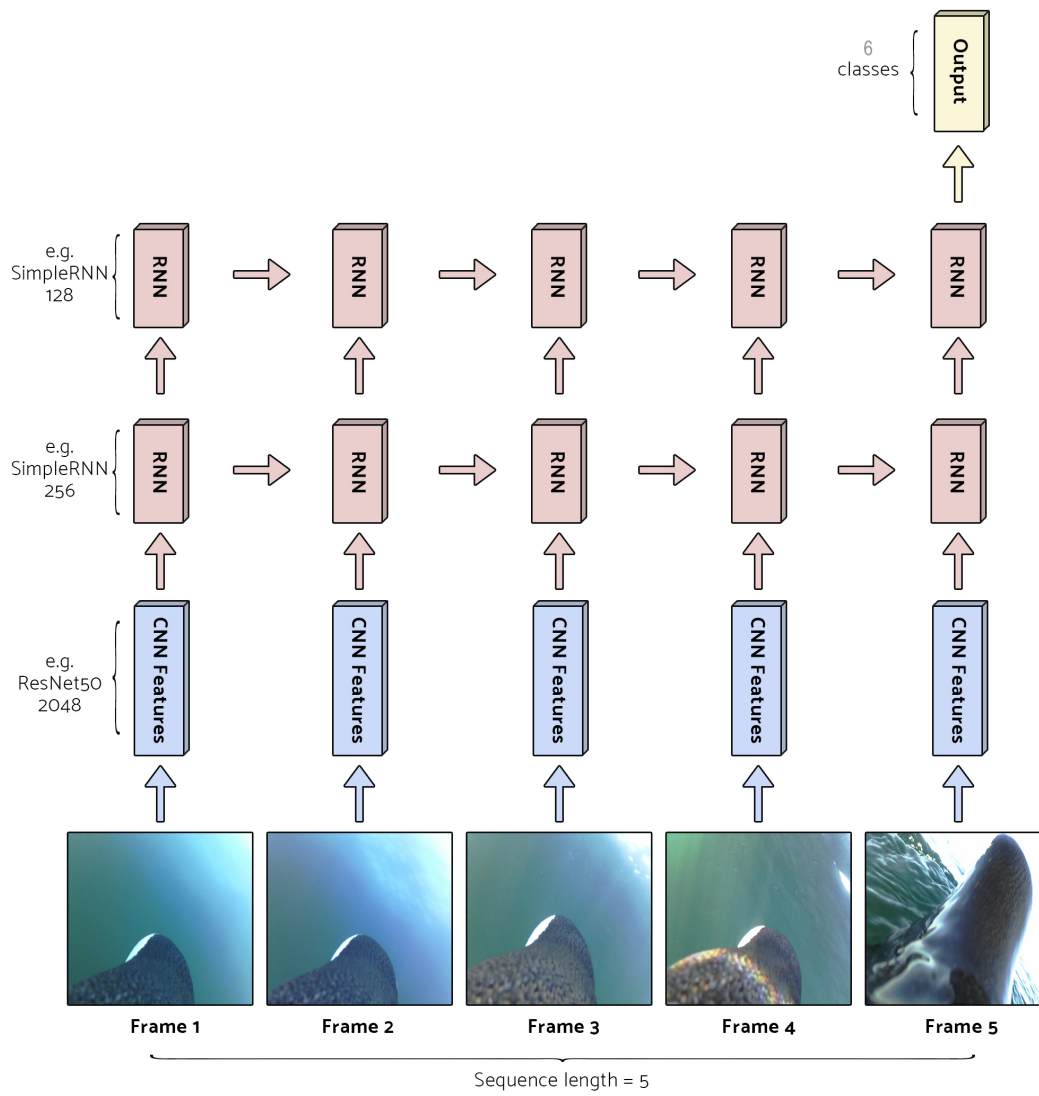

Figure 1

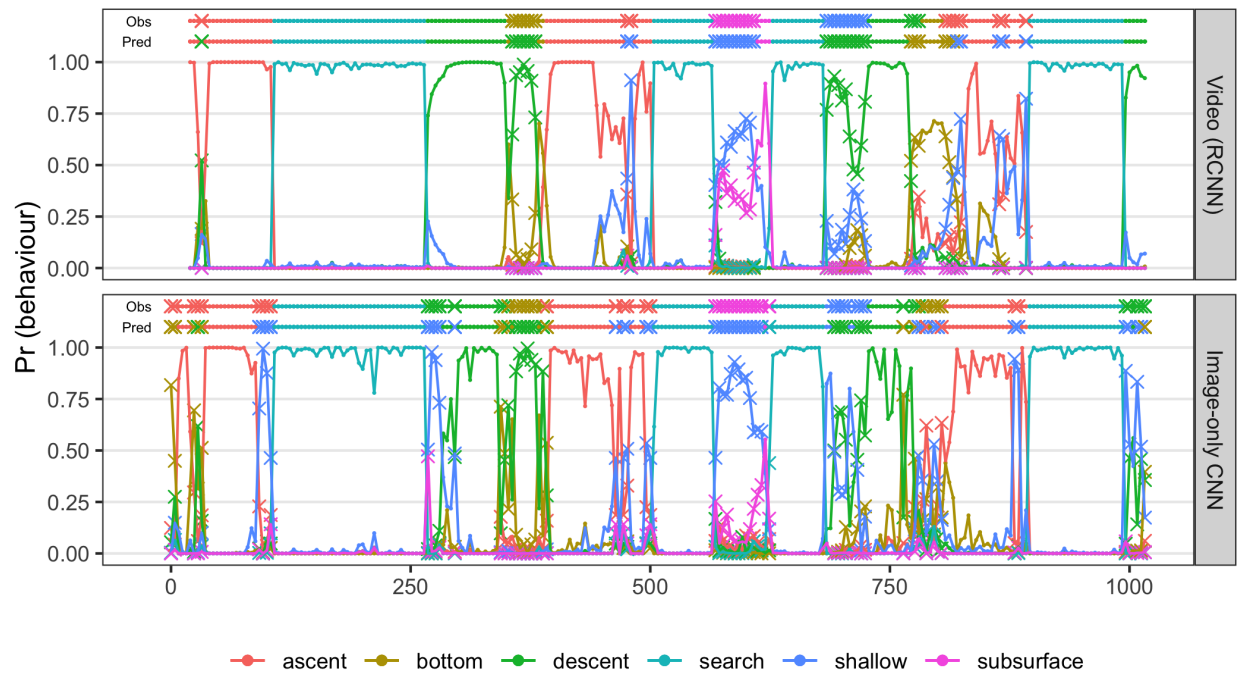

Figure 2

## References

- 344
- 345 Abadi, M., Barham, P., Chen, J., Chen, Z., Davis, A., Dean, J., . . . others (2016). Tensorflow: a  
346 system for large-scale machine learning. In *Osd* (Vol. 16, pp. 265–283).
- 347 Anderson, K., & Gaston, K. J. (2013). Lightweight unmanned aerial vehicles will revolutionize  
348 spatial ecology. *Frontiers in Ecology and the Environment*, *11*(3), 138–146.
- 349 Borowicz, A., McDowall, P., Youngflesh, C., Sayre-McCord, T., Clucas, G., Herman, R., . . . oth-  
350 ers (2018). Multi-modal survey of adélie penguin mega-colonies reveals the danger islands  
351 as a seabird hotspot. *Scientific reports*, *8*(1), 1–9.
- 352 Chollet, F., et al. (2015). *Keras*.
- 353 Christin, S., Hervet, E., & Lecomte, N. (2019). Applications for deep learning in ecology. *Meth-*  
354 *ods in Ecology and Evolution*, *10*(10), 1632–1644.
- 355 Cruzan, M. B., Weinstein, B. G., Grasty, M. R., Kohn, B. F., Hendrickson, E. C., Arredondo,  
356 T. M., & Thompson, P. G. (2016). Small unmanned aerial vehicles (micro-uavs, drones) in  
357 plant ecology. *Applications in plant sciences*, *4*(9), 1600041.
- 358 Dollár, P., Rabaud, V., Cottrell, G., & Belongie, S. (2005). Behavior recognition via sparse  
359 spatio-temporal features. In *2005 ieee international workshop on visual surveillance and*  
360 *performance evaluation of tracking and surveillance* (pp. 65–72).
- 361 Donahue, J., Hendricks, L. A., Rohrbach, M., Venugopalan, S., Guadarrama, S., Saenko, K., &  
362 Darrell, T. (2014). Long-term Recurrent Convolutional Networks for Visual Recognition  
363 and Description. *Proceedings of the IEEE Computer Society Conference on Computer*  
364 *Vision and Pattern Recognition*, 2625–2634.
- 365 Gomez Villa, A., Salazar, A., & Vargas, F. (2017). Towards automatic wild animal monitoring:  
366 Identification of animal species in camera-trap images using very deep convolutional neural  
367 networks. *Ecological Informatics*, *41*, 24–32. doi: 10.1016/j.ecoinf.2017.07.004
- 368 Gray, P. C., Bierlich, K. C., Mantell, S. A., Friedlaender, A. S., Goldbogen, J. A., & Johnston,  
369 D. W. (2019). Drones and convolutional neural networks facilitate automated and accurate  
370 cetacean species identification and photogrammetry. *Methods in Ecology and Evolution*,  
371 *10*(9), 1490–1500.
- 372 Gray, P. C., Fleishman, A. B., Klein, D. J., McKown, M. W., Bézy, V. S., Lohmann, K. J., &  
373 Johnston, D. W. (2019). A convolutional neural network for detecting sea turtles in drone  
374 imagery. *Methods in Ecology and Evolution*, *10*(3), 345–355.
- 375 Kingma, D. P., & Ba, J. (2014). Adam: A method for stochastic optimization. *arXiv preprint*,  
376 *arXiv:1412*.
- 377 Krizhevsky, A., Sutskever, I., & Hinton, G. E. (2012). ImageNet Classification with Deep Convo-  
378 lutional Neural Networks. *Advances in neural information processing systems*, 1097–1105.  
379 doi: <http://dx.doi.org/10.1016/j.protcy.2014.09.007>
- 380 Liu, W., Wang, Z., Liu, X., Liu, Y., & Alsaadi, F. E. (2016). A survey of deep neural network  
381 architectures and their applications. *Neurocomputing*, *234*, 11–26. Retrieved from [http://](http://dx.doi.org/10.1016/j.neucom.2016.12.038)  
382 [dx.doi.org/10.1016/j.neucom.2016.12.038](http://dx.doi.org/10.1016/j.neucom.2016.12.038) doi: 10.1016/j.neucom.2016.12.038
- 383 Lowe, D. G. (2004). Distinctive image features from scale-invariant keypoints. *International*  
384 *journal of computer vision*, *60*(2), 91–110.
- 385 McInnes, A. M., McGeorge, C., Ginsberg, S., Pichegru, L., & Pistorius, P. A. (2017). Group  
386 foraging increases foraging efficiency in a piscivorous diver, the african penguin. *Royal*  
387 *Society open science*, *4*(9), 170918.

- 388 Rutz, C., & Troschianko, J. (2013). Programmable, miniature video-loggers for deployment on  
389 wild birds and other wildlife. *Methods in Ecology and Evolution*, 4(2), 114–122.
- 390 Schneider, S., Taylor, G. W., Linquist, S., & Kremer, S. C. (2019). Past, present and future ap-  
391 proaches using computer vision for animal re-identification from camera trap data. *Meth-*  
392 *ods in Ecology and Evolution*, 10(4), 461–470. doi: 10.1111/2041-210X.13133
- 393 Siddiqui, S. A., Salman, A., Malik, M. I., Shafait, F., Mian, A., Shortis, M. R., & Harvey, E. S.  
394 (2018). Automatic fish species classification in underwater videos : exploiting pre-trained  
395 deep neural network models to compensate for limited labelled data. *ICES Journal of Ma-*  
396 *rine Science*, 75, 374–389. doi: 10.1093/icesjms/fsx109
- 397 Swinnen, K. R. R., Reijniers, J., Breno, M., & Leirs, H. (2014). A Novel Method to Reduce  
398 Time Investment When Processing Videos from Camera Trap Studies. *PloS one*, 9(6). doi:  
399 10.1371/journal.pone.0098881
- 400 Takahashi, A., Sato, K., Naito, Y., Dunn, M., Trathan, P., & Croxall, J. (2004). Penguin-mounted  
401 cameras glimpse underwater group behaviour. *Proceedings of the Royal Society of London.*  
402 *Series B: Biological Sciences*, 271(suppl\_5), S281–S282.
- 403 Torney, C. J., Lloyd-Jones, D. J., Chevallier, M., Moyer, D. C., Maliti, H. T., Mwita, M., . . .  
404 Hopcraft, G. C. (2019). A comparison of deep learning and citizen science techniques  
405 for counting wildlife in aerial survey images. *Methods in Ecology and Evolution*, 10(6),  
406 779–787.
- 407 Tran, D., Bourdev, L., Fergus, R., Torresani, L., & Paluri, M. (2015). Learning Spatiotemporal  
408 Features with 3D Convolutional Networks. *Proceedings of the IEEE international confer-*  
409 *ence on computer vision*, 4489–4497.
- 410 Trinh, T. T., Yoshihashi, R., Kawakami, R., Iida, M., & Naemura, T. (2016). Bird detection  
411 near wind turbines from high-resolution video using lstm networks. *World Wind Energy*  
412 *Conference*.
- 413 Weinstein, B. G. (2015). Motion meerkat: integrating motion video detection and ecological  
414 monitoring. *Methods in Ecology and Evolution*, 6(3), 357–362.
- 415 Weinstein, B. G. (2018a). A computer vision for animal ecology. *Journal of Animal Ecology*,  
416 87(3), 533–545.
- 417 Weinstein, B. G. (2018b). Scene-specific convolutional neural networks for video-based biodi-  
418 versity detection. *Methods in Ecology and Evolution*, 9(6), 1435–1441.
- 419 Zhang, Z., He, Z., Cao, G., & Cao, W. (2016). Animal Detection from Highly Cluttered Natu-  
420 ral Scenes Using Spatiotemporal Object Region Proposals and Patch Verification. *IEEE*  
421 *Transactions on Multimedia*, 18(10), 2079–2092. doi: 10.1109/TMM.2016.2594138
